# Supplementary material for: Identification and Functional Analysis of the Phosphatidylethanolamine-Binding Protein (PEBP) Gene Family in Liriodendron Hybrids
Source: MDPI journal article supplement (doi:10.3390/f14102103), 2023-10-20
Supplement: s1 [file s1]

Table S1. Primers and original accession information for *LhPEBP* genes in *Liriodendron* hybrids

| Gene name     | Primer                                                        | <i>L. chinense</i><br>Gene code | <i>L. chinense</i><br>CDS length |
|---------------|---------------------------------------------------------------|---------------------------------|----------------------------------|
| <i>LhFT</i>   | F: ATCCCATGCCTAGAGAAAGAGAACC<br>R: TTATCCCCTTCTTCCACCAG       | <i>Lchi27713</i>                | 267                              |
| <i>LhTFL</i>  | F: ATGGCAAGAATGTCAGAGCCCCTTA<br>R: TCAGCGTCTCCTTGCAGCTGTTTC   | <i>Lchi10509</i>                | 327                              |
| <i>LhMFT1</i> | F: ATGGCTTGCTCTATAGACCCTTTGG<br>R: TCAACGGCGCTTGTTTCATGGGCTCC | <i>Lchi05661</i>                | 522                              |
| <i>LhMFT2</i> | F: ATGGCTCGCTCTGTGGAGCCTTTGG<br>R: ATGGCAACCGGCAATTGC         | <i>Lchi25487</i>                | 321                              |
| <i>LhBFT</i>  | F: ATGTCGAGGTTTCATTGAACCCCTTA<br>R: CTATCTCCTTCTTGCGGCTGTTTCA | <i>Lchi11903</i>                | 258                              |
