# Supplementary material for: Identification and Functional Analysis of the Phosphatidylethanolamine-Binding Protein (PEBP) Gene Family in Liriodendron Hybrids
Source: MDPI journal article supplement (doi:10.3390/f14102103), 2023-10-20
Supplement: s1 [file s1]

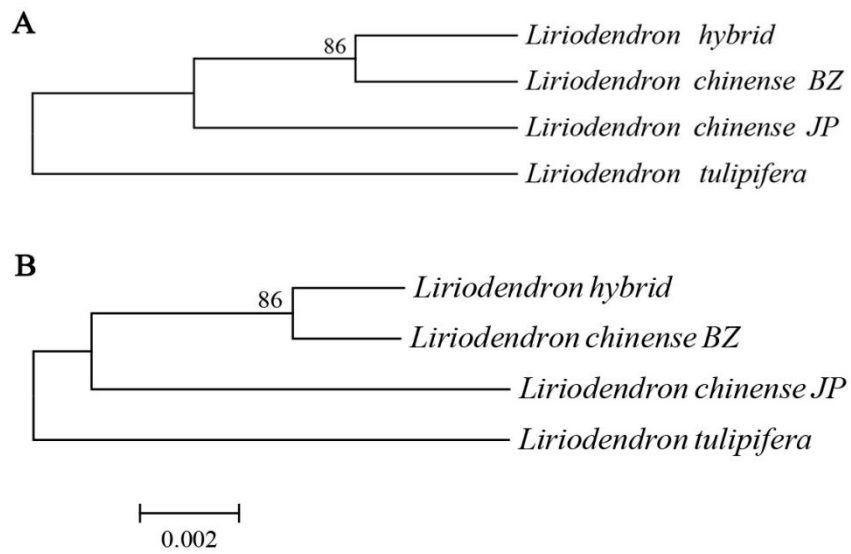

Figure S1. Phylogenetic analysis of *BFT* genes in *Liriodendron*. The tree was constructed based on DNA sequence (A) and amino acid (B) using the Maximum Likelihood method in MEGA 6.0. The number at the nodes represents the bootstraps values based on 1000 replications (%).
