# Supplementary material for: Identification and Functional Analysis of the Phosphatidylethanolamine-Binding Protein (PEBP) Gene Family in Liriodendron Hybrids
Source: MDPI journal article supplement (doi:10.3390/f14102103), 2023-10-20
Supplement: s1 [file s1]

**Table S3.** Flowering traits of *Col-0*, *LhPEBP* transgenic lines and *mft* mutants

| Type               | Days to flowering        | Number of rosette leaves |
|--------------------|--------------------------|--------------------------|
| <i>Col-0</i>       | 24.72±3.66 <sup>bc</sup> | 8.36±1.45 <sup>bc</sup>  |
| <i>35S::LhFT</i>   | 18.70±2.21 <sup>a</sup>  | 6.44±1.01 <sup>a</sup>   |
| <i>35S::LhTFL1</i> | 24.29±3.95 <sup>bc</sup> | 9.50±1.09 <sup>d</sup>   |
| <i>35S::LhMFT1</i> | 24.07±3.56 <sup>b</sup>  | 8.00±1.04 <sup>b</sup>   |
| <i>35S::LhMFT2</i> | 26.93±3.22 <sup>c</sup>  | 12.09±1.58 <sup>e</sup>  |
| <i>mft</i> mutant  | 23.93±3.20 <sup>b</sup>  | 9.14±1.56 <sup>cd</sup>  |

Values represent means±standard deviations (SDs). Different letters in the right corner indicate significant differences in ANOVA tests under the Duncan method ( $P < 0.05$ )
