# Supplementary material for: Identification and Functional Analysis of the Phosphatidylethanolamine-Binding Protein (PEBP) Gene Family in Liriodendron Hybrids
Source: MDPI journal article supplement (doi:10.3390/f14102103), 2023-10-20
Supplement: s1 [file s1]

Table S2. Information for *BFT* genes in *Liriodendron*

| Gene<br>code | Species                                  | NCBI accession<br>number | Length<br>(bp) | Sequences similar to<br><i>LhBFT</i> (%) |
|--------------|------------------------------------------|--------------------------|----------------|------------------------------------------|
| <i>LhBFT</i> | <i>Liriodendron</i><br><i>hybrids</i>    | OR347689                 | 1114           | -                                        |
| <i>LtBFT</i> | <i>Liriodendron</i><br><i>tulipifera</i> | OR347690                 | 1115           | 98.30%                                   |
| <i>LcBFT</i> | <i>Liriodendron</i><br><i>chinense</i>   | OR347691                 | 1115           | 99.55%                                   |
| <i>LcBFT</i> | <i>Liriodendron</i><br><i>chinense</i>   | OR347692                 | 1115           | 98.57%                                   |
