# Supplementary material for: Identification and Functional Analysis of the Phosphatidylethanolamine-Binding Protein (PEBP) Gene Family in Liriodendron Hybrids
Source: MDPI journal article supplement (doi:10.3390/f14102103), 2023-10-20
Supplement: s1 [file s1]

Table S4. Time course of the seed germination for *Col-0*, over expressed *LhPEBPs* transgenic lines and *mft* mutations in *Arabidopsis* under 1/2 MS, with or without 1  $\mu$ M GA3 or 10  $\mu$ M ABA treatment. Different letters in the right corner indicate significant differences of ANOVA tests under the Duncan method for all the gene lines with different treatment in the same day ( $P < 0.05$ )

| Gene lines         | Treatment | Day 1 | Day 2                           | Day 3                            | Day 4                           | Day 5                           | Day 6                          | Day 7                          | Day 8                           |
|--------------------|-----------|-------|---------------------------------|----------------------------------|---------------------------------|---------------------------------|--------------------------------|--------------------------------|---------------------------------|
| <i>Col-0</i>       | GA3       | 0     | 24.05 $\pm$ 6.19 <sup>ab</sup>  | 66.03 $\pm$ 15.38 <sup>ab</sup>  | 80.99 $\pm$ 8.66 <sup>bcd</sup> | 84.83 $\pm$ 10.24 <sup>cd</sup> | 87.52 $\pm$ 7.95 <sup>ab</sup> | 87.52 $\pm$ 7.95 <sup>bc</sup> | 88.85 $\pm$ 7.06 <sup>bcd</sup> |
| <i>35S::LhFT</i>   | GA3       | 0     | 51.62 $\pm$ 0.89 <sup>ef</sup>  | 81.61 $\pm$ 2.40 <sup>cd</sup>   | 89.95 $\pm$ 2.52 <sup>def</sup> | 89.95 $\pm$ 2.52 <sup>cde</sup> | 91.43 $\pm$ 1.47 <sup>ab</sup> | 91.43 $\pm$ 1.47 <sup>bc</sup> | 91.43 $\pm$ 1.47 <sup>cd</sup>  |
| <i>35S::LhTFL</i>  | GA3       | 0     | 42.74 $\pm$ 3.63 <sup>de</sup>  | 82.91 $\pm$ 20.84 <sup>cde</sup> | 98.59 $\pm$ 0.11 <sup>f</sup>   | 98.59 $\pm$ 0.11 <sup>e</sup>   | 98.59 $\pm$ 0.11 <sup>b</sup>  | 98.59 $\pm$ 0.11 <sup>bc</sup> | 98.59 $\pm$ 0.11 <sup>de</sup>  |
| <i>35S::LhMFT1</i> | GA3       | 0     | 56.15 $\pm$ 4.50 <sup>f</sup>   | 95.39 $\pm$ 1.31 <sup>de</sup>   | 98.74 $\pm$ 0.09 <sup>f</sup>   | 98.74 $\pm$ 0.09 <sup>e</sup>   | 98.74 $\pm$ 0.09 <sup>b</sup>  | 98.74 $\pm$ 0.09 <sup>bc</sup> | 98.74 $\pm$ 0.09 <sup>de</sup>  |
| <i>35S::LhMFT2</i> | GA3       | 0     | 24.00 $\pm$ 4.01 <sup>ab</sup>  | 59.91 $\pm$ 10.85 <sup>a</sup>   | 82.76 $\pm$ 6.85 <sup>cde</sup> | 86.3 $\pm$ 8.42 <sup>cde</sup>  | 86.30 $\pm$ 8.42 <sup>ab</sup> | 86.30 $\pm$ 8.42 <sup>b</sup>  | 86.30 $\pm$ 8.42 <sup>bc</sup>  |
| <i>mft</i> mutant  | GA3       | 0     | 54.66 $\pm$ 1.01 <sup>f</sup>   | 97.45 $\pm$ 0.55 <sup>e</sup>    | 99.06 $\pm$ 0.96 <sup>f</sup>   | 99.09 $\pm$ 0.97 <sup>e</sup>   | 99.09 $\pm$ 0.97 <sup>b</sup>  | 99.09 $\pm$ 0.97 <sup>c</sup>  | 99.09 $\pm$ 0.97 <sup>de</sup>  |
| <i>Col-0</i>       | ABA       | 0     | 0                               | 0.14 $\pm$ 0.29 <sup>a</sup>     | 23.89 $\pm$ 12.55 <sup>a</sup>  | 38.68 $\pm$ 10.56 <sup>a</sup>  | 52.30 $\pm$ 5.22 <sup>a</sup>  | 59.09 $\pm$ 7.26 <sup>a</sup>  | 62.93 $\pm$ 10.47 <sup>a</sup>  |
| <i>35S::LhFT</i>   | ABA       | 0     | 0                               | 0                                | 38.06 $\pm$ 3.51 <sup>b</sup>   | 44.95 $\pm$ 3.19 <sup>ab</sup>  | 54.42 $\pm$ 5.79 <sup>a</sup>  | 62.05 $\pm$ 8.16 <sup>ab</sup> | 69.68 $\pm$ 11.97 <sup>ab</sup> |
| <i>35S::LhTFL</i>  | ABA       | 0     | 0                               | 0                                | 39.08 $\pm$ 21.79 <sup>b</sup>  | 52.73 $\pm$ 12.82 <sup>bc</sup> | 61.21 $\pm$ 9.33 <sup>a</sup>  | 71.74 $\pm$ 4.14 <sup>b</sup>  | 79.89 $\pm$ 4.63 <sup>bc</sup>  |
| <i>35S::LhMFT1</i> | ABA       | 0     | 0                               | 1.97 $\pm$ 1.88 <sup>a</sup>     | 67.84 $\pm$ 10.39 <sup>c</sup>  | 77.66 $\pm$ 8.10 <sup>d</sup>   | 93.77 $\pm$ 2.67 <sup>bc</sup> | 97.21 $\pm$ 1.55 <sup>cd</sup> | 98.63 $\pm$ 0.55 <sup>e</sup>   |
| <i>35S::LhMFT2</i> | ABA       | 0     | 0                               | 1.67 $\pm$ 1.65 <sup>a</sup>     | 45.87 $\pm$ 11.28 <sup>b</sup>  | 57.92 $\pm$ 12.78 <sup>c</sup>  | 81.64 $\pm$ 8.87 <sup>b</sup>  | 90.34 $\pm$ 1.91 <sup>cd</sup> | 92.62 $\pm$ 0.73 <sup>de</sup>  |
| <i>mft</i> mutant  | ABA       | 0     | 0                               | 3.75 $\pm$ 3.27 <sup>a</sup>     | 71.06 $\pm$ 6.91 <sup>cd</sup>  | 80.51 $\pm$ 4.71 <sup>d</sup>   | 93.62 $\pm$ 2.62 <sup>bc</sup> | 94.74 $\pm$ 1.72 <sup>cd</sup> | 96.32 $\pm$ 1.76 <sup>de</sup>  |
| <i>Col-0</i>       | -         | 0     | 15.78 $\pm$ 5.80 <sup>a</sup>   | 67.38 $\pm$ 9.29 <sup>ab</sup>   | 85.49 $\pm$ 6.2 <sup>def</sup>  | 86.98 $\pm$ 5.17 <sup>cde</sup> | 86.98 $\pm$ 5.17 <sup>ab</sup> | 86.98 $\pm$ 5.17 <sup>bc</sup> | 86.98 $\pm$ 5.17 <sup>bcd</sup> |
| <i>35S::LhFT</i>   | -         | 0     | 28.57 $\pm$ 7.03 <sup>bc</sup>  | 78.63 $\pm$ 7.77 <sup>bc</sup>   | 88.75 $\pm$ 4.25 <sup>def</sup> | 88.75 $\pm$ 4.25 <sup>cde</sup> | 88.75 $\pm$ 4.25 <sup>ab</sup> | 88.75 $\pm$ 4.25 <sup>bc</sup> | 88.75 $\pm$ 4.25 <sup>bcd</sup> |
| <i>35S::LhTFL</i>  | -         | 0     | 31.61 $\pm$ 4.60 <sup>bc</sup>  | 89.57 $\pm$ 4.91 <sup>cde</sup>  | 96.47 $\pm$ 0.46 <sup>ef</sup>  | 96.92 $\pm$ 0.42 <sup>de</sup>  | 96.92 $\pm$ 0.42 <sup>b</sup>  | 96.92 $\pm$ 0.42 <sup>bc</sup> | 96.92 $\pm$ 0.42 <sup>cd</sup>  |
| <i>35S::LhMFT1</i> | -         | 0     | 54.61 $\pm$ 12.27 <sup>f</sup>  | 94.49 $\pm$ 3.34 <sup>de</sup>   | 97.19 $\pm$ 2.25 <sup>ef</sup>  | 97.19 $\pm$ 2.25 <sup>de</sup>  | 97.19 $\pm$ 2.25 <sup>b</sup>  | 97.19 $\pm$ 2.25 <sup>bc</sup> | 97.19 $\pm$ 2.25 <sup>cd</sup>  |
| <i>35S::LhMFT2</i> | -         | 0     | 36.16 $\pm$ 10.07 <sup>cd</sup> | 84.80 $\pm$ 8.61 <sup>cde</sup>  | 93.65 $\pm$ 4.67 <sup>def</sup> | 94.40 $\pm$ 4.17 <sup>de</sup>  | 94.40 $\pm$ 4.17 <sup>ab</sup> | 94.40 $\pm$ 4.17 <sup>bc</sup> | 94.40 $\pm$ 4.17 <sup>cd</sup>  |
| <i>mft</i> mutant  | -         | 0     | 51.02 $\pm$ 8.52 <sup>ef</sup>  | 88.34 $\pm$ 5.21 <sup>cde</sup>  | 96.03 $\pm$ 3.30 <sup>ef</sup>  | 96.50 $\pm$ 3.63 <sup>de</sup>  | 97.14 $\pm$ 2.52 <sup>b</sup>  | 97.14 $\pm$ 2.52 <sup>bc</sup> | 97.14 $\pm$ 2.52 <sup>cd</sup>  |
